# Supplementary material for: The ABA-LANCL1/2 Hormone-Receptors System Protects H9c2 Cardiomyocytes from Hypoxia-Induced Mitochondrial Injury via an AMPK- and NO-Mediated Mechanism
Source: MDPI journal article supplement (doi:10.3390/cells11182888), 2022-09-15
Supplement: s1 [file s1]

SUPPLEMENTARY DATA

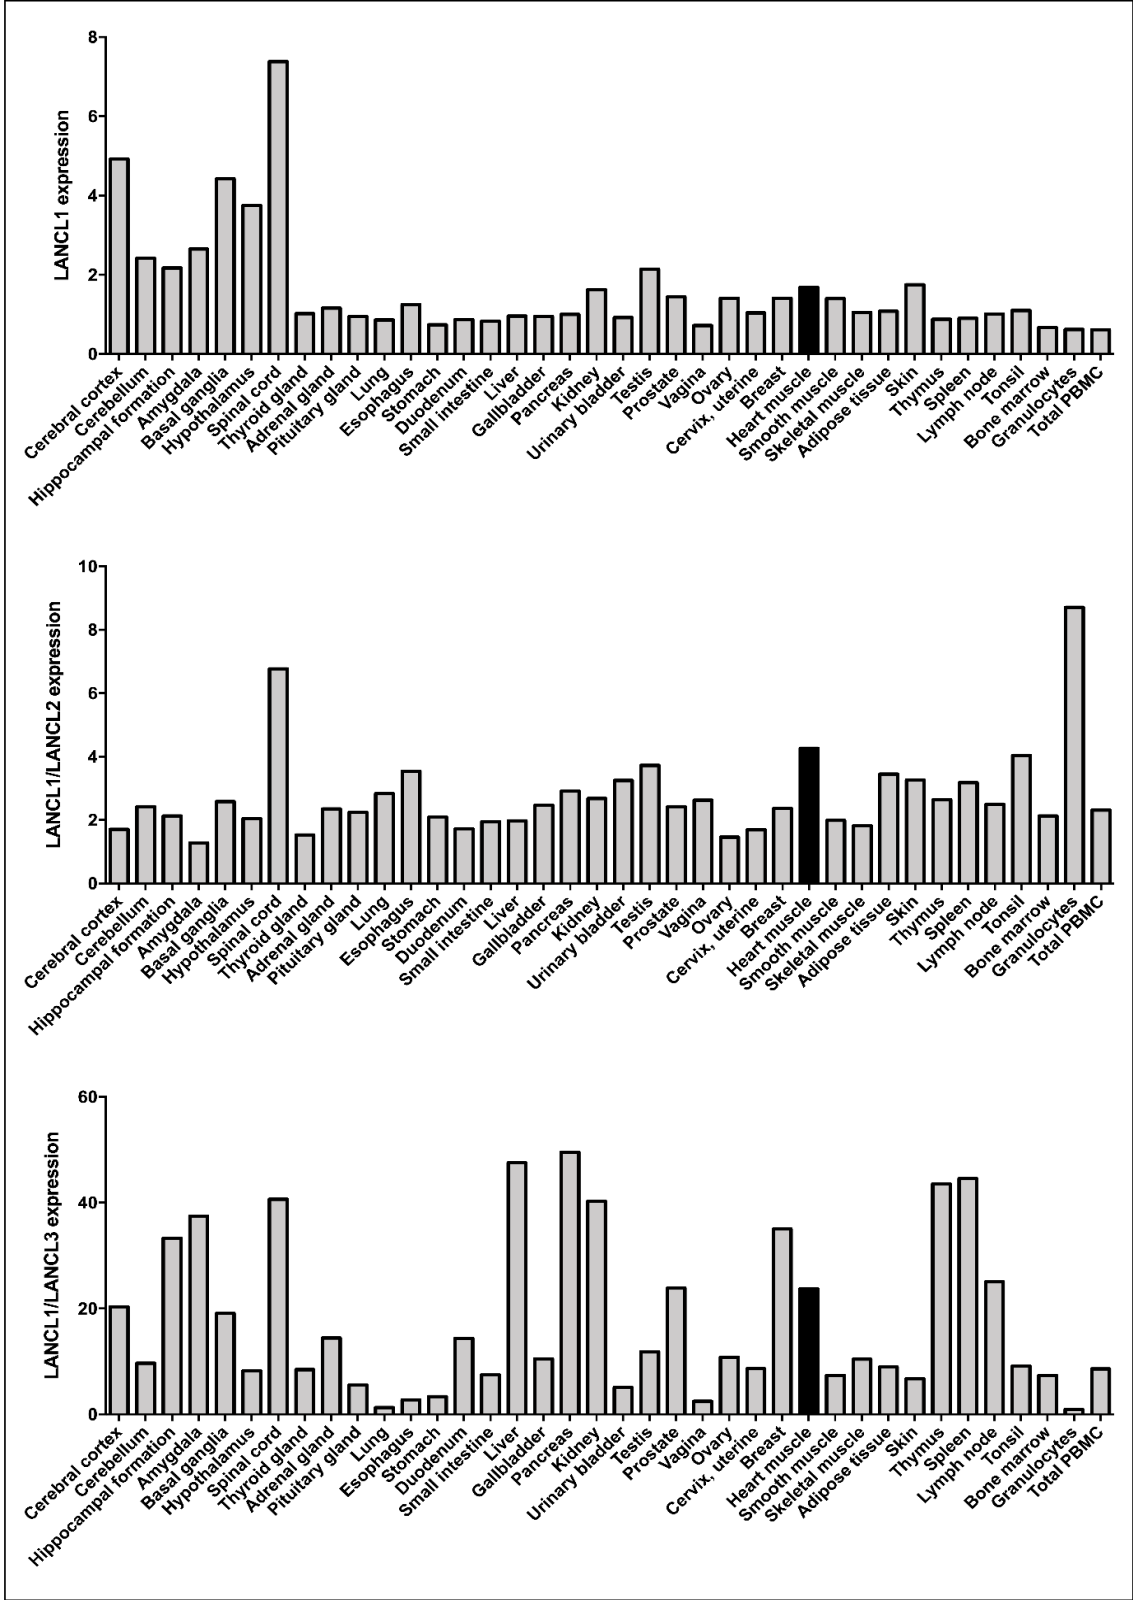

Figure S1. Tissue expression levels of LANCL proteins could mediate a tissue-specific function.

**Table S1.** Primer sequences used to amplify rat target genes.

| <b>Rat genes</b> | <b>Accession N.</b> | <b>Forward Primer 5'-3'</b> | <b>Reverse Primer 5'-3'</b>                          |
|------------------|---------------------|-----------------------------|------------------------------------------------------|
| Lanc1            | NM_053723           | TCTTGCTCCTCATCCTGCTCATC     | CACTGTACTCGCCGAAGG<br>TCTC                           |
| Lanc2            | NM_001014187        | GGTGCCACGGTGCTCCAG          | CCTCGCTGCCAAATCACA<br>TCAC                           |
| Prkaa2           | NM_019142           | AGAAGCAGAAGCACGACGG         | GAAGGTGCCGACGCCC                                     |
| Ppargc1a         | NM_031347           | GCACACATCGCAATTCTCCC        | CTCTGCGGTATTCGTCCCT<br>C                             |
| Sirt1            | NM_001372090        | CAGTGTCATGGTTCCTTTGC        | CACCGAGGAACTACCTGA<br>T                              |
| Nampt            | NM_177928           | TCGGTTCTGGTGGAGGTTTGCTAC    | TCCCTGCTGGCGTCCTATG<br>TAAAG                         |
| Hprt1            | NM_012583           | TTGGTCAAGCAGTACAGCCC        | TGGCCTGTATCCAACACTT<br>CG                            |
| Tbc1d1           | XM_032917081        | AGTCAGGACCCGAGCTACTT        | CTGCCGGATGGAGCTAAT                                   |
| Nos1             | NM_052799           | AGAGGAGGACGCTGGTGTAT        | GA                                                   |
| Nos2             | NM_012611           | GGAGAAAACCCCAGGTGCTA        | AAGGCGGTTGGTCACTTC<br>AT<br>TGAGGAACTGGGGGAAA<br>CCA |
| Nos3             | NM_021838           | AGGCCTTGGTATTGGTGGTG        | TAGGGGCCCCGACATTTCC<br>AT                            |
| Gch1             | NM_024356           | GCGTCGGGGTAGTGATTGAA        | AGCATGGTGCTAGTGACA<br>GT                             |
| Arg2             | U90887              | AAAAGGCAGAGGCCAATCCA        | TCCCCCTACAACAGGGGT<br>TC                             |
| Slc7a2           | NM_001134686        | TCCCTCTGCGCCTTATCAAC        | TTTGAAAAGCAACCCATC<br>CTCC                           |
| Nadk2            | NM_001044252        | AAGAGCGCACGATGAAAGGT        | GCTACAGCCCAACAATAA<br>GGC                            |

**Table S2.** Primary and secondary antibodies used for Western blot.

| <b>Primary Antibody</b>   | <b>Host</b>           | <b>Concentrations</b> | <b>Manufacturer</b>                          |
|---------------------------|-----------------------|-----------------------|----------------------------------------------|
| Anti-LANCL1               | Rabbit                | 1:250                 | Novus Biologicals                            |
| Anti-LANCL2               | Mouse                 | 1:1000                | Reference [19]                               |
| Anti-AMPK tot             | Rabbit                | 1:1000                | Cell Signaling Technology, Danvers, MA       |
| Anti-pAMPK<br>P-Thr172    | Rabbit                | 1:1000                | Cell Signaling Technology, Danvers, MA       |
| Anti-vinculin             | Rabbit                | 1:1000                | Cell Signaling Technology, Danvers, MA       |
| Anti-Akt tot              | Rabbit                | 1:1000                | Cell Signaling Technology, Danvers, MA       |
| Anti-pAkt<br>P-Ser473     | Rabbit                | 1:1000                | Santa Cruz Biotechnology Inc.,<br>California |
| Anti-eNOS tot             | rabbit                | 1:1000                | Cell Signaling Technology, Danvers, MA       |
| Anti-peNOS<br>P-Ser1177   | rabbit                | 1:1000                | Cell Signaling Technology, Danvers, MA       |
| Anti- $\alpha$ tubulin    | rabbit                | 1:200                 | Cell Signaling Technology, Danvers, MA       |
| <b>Secondary Antibody</b> | <b>Concentrations</b> |                       | <b>Manufacturer</b>                          |
| Anti-Mouse                | 1:2000                |                       | Santa Cruz Biotechnology Inc.,<br>California |
| Anti-Rabbit               | 1:1000                |                       | Santa Cruz Biotechnology Inc.,<br>California |
